# Supplementary material for: Does Prenatal Physical Activity Affect the Occurrence of Postnatal Anxiety and Depression? Longitudinal Study
Source: MDPI journal article supplement (doi:10.3390/ijerph19042284), 2022-02-17
Supplement: s1 [file s1]

Supplementary Table S1. Characteristics of the study group.

| Variables                      | Descriptive statistics |           |          |         |           |          |          |          |              |              |
|--------------------------------|------------------------|-----------|----------|---------|-----------|----------|----------|----------|--------------|--------------|
|                                | N                      | $\bar{x}$ | Me       | Min.    | Max.      | Q1       | Q3       | SD       | CI<br>-95.0% | CI<br>+95.0% |
| Age [years]                    | 187                    | 29.19     | 29.00    | 19.00   | 41.00     | 26.00    | 31.00    | 4.01     | 3.64         | 4.47         |
| Body height [cm]               | 187                    | 165.05    | 165.00   | 150.00  | 187.00    | 160.00   | 170.00   | 6.19     | 5.62         | 6.89         |
| Body mass [kg]                 | 187                    | 66.93     | 66.00    | 45.00   | 112.00    | 60.00    | 73.00    | 10.53    | 9.56         | 11.72        |
| BMI                            | 187                    | 24.50     | 24.17    | 17.91   | 36.81     | 22.15    | 26.04    | 3.10     | 2.81         | 3.45         |
| Number of pregnancy            | 187                    | 1.77      | 2.00     | 1.00    | 4.00      | 1.00     | 2.00     | 0.80     | 0.73         | 0.89         |
| Sedentary [min]                | 187                    | 3953.19   | 3240.42  | 510.25  | 9911.8    | 2544.92  | 4383.67  | 2170.49  | 1970.55      | 2415.94      |
| Light [min]                    | 187                    | 1090.08   | 1117.42  | 70.83   | 2080.50   | 846.17   | 1334.67  | 363.40   | 329.92       | 404.49       |
| Moderate [min]                 | 186                    | 626.62    | 355.13   | 48.08   | 2105.00   | 199.92   | 1061.67  | 499.18   | 453.08       | 555.80       |
| Vigorous [min]                 | 187                    | 102.48    | 76.50    | 0.00    | 516.08    | 0.00     | 158.33   | 114.66   | 104.10       | 127.63       |
| % in Sedentary                 | 187                    | 66.07     | 67.00    | 31.00   | 99.00     | 57.43    | 74.22    | 13.10    | 11.89        | 14.58        |
| % in Light                     | 187                    | 20.89     | 22.10    | 1.00    | 36.00     | 17.33    | 26.00    | 7.17     | 6.51         | 7.98         |
| % in Moderate                  | 187                    | 11.15     | 6.38     | 1.00    | 39.00     | 4.25     | 19.00    | 8.67     | 7.87         | 9.65         |
| % in Vigorous                  | 187                    | 1.85      | 1.58     | 0.00    | 7.00      | 0.00     | 3.15     | 1.88     | 1.71         | 2.10         |
| Total MVPA [min]               | 187                    | 730.80    | 538.42   | 64.42   | 2156.17   | 321.50   | 1071.08  | 511.67   | 464.54       | 569.53       |
| % in MVPA                      | 187                    | 12.18     | 9.51     | 0.22    | 38.88     | 5.99     | 18.46    | 7.95     | 7.22         | 8.85         |
| Average MVPA per day [min]     | 187                    | 113.87    | 82.15    | 9.20    | 308.02    | 53.58    | 162.17   | 73.53    | 66.76        | 81.84        |
| Steps Counts                   | 187                    | 53475.50  | 54253.00 | 3320.00 | 105283.00 | 38932.00 | 65488.00 | 19470.30 | 17676.74     | 21672.11     |
| Steps counts per day           | 187                    | 8461.50   | 8774.00  | 474.29  | 15040.43  | 6791.00  | 10053.50 | 2658.75  | 2413.83      | 2959.42      |
| GAD7 before birth              | 187                    | 6.19      | 6.00     | 1.00    | 18.00     | 4.00     | 7.00     | 3.33     | 3.02         | 3.70         |
| GAD7 after childbirth          | 187                    | 6.11      | 6.00     | 1.00    | 16.00     | 4.00     | 8.00     | 3.31     | 3.00         | 3.68         |
| GAD7 6 months after childbirth | 187                    | 4.37      | 4.00     | 1.00    | 13.00     | 2.00     | 6.00     | 2.71     | 2.46         | 3.02         |
| EDSP before birth              | 187                    | 5.13      | 5.00     | 1.00    | 13.00     | 3.00     | 7.00     | 2.81     | 2.55         | 3.12         |
| EDSP after childbirth          | 187                    | 7.98      | 7.00     | 3.00    | 19.00     | 5.00     | 10.00    | 3.51     | 3.19         | 3.91         |
| EDSP 6 months after childbirth | 187                    | 5.79      | 5.00     | 1.00    | 18.00     | 3.00     | 7.00     | 3.84     | 3.49         | 4.27         |

Supplementary Table S2. Sociodemographic characteristics of the study group.

|                                   | N   | N All | %     | Procent<br>All |
|-----------------------------------|-----|-------|-------|----------------|
| <b>Place of residence</b>         |     |       |       |                |
| Urban area                        | 109 | 109   | 58.29 | 58.3           |
| Rural area                        | 78  | 187   | 41.71 | 100.0          |
| <b>Education</b>                  |     |       |       |                |
| Basic                             | 0   | 0     | 0.00  | 0.0            |
| Professional                      | 0   | 0     | 0.00  | 0.0            |
| Medium                            | 46  | 46    | 24.60 | 24.6           |
| Higher                            | 141 | 187   | 75.40 | 100.0          |
| <b>Marital status</b>             |     |       |       |                |
| Single                            | 17  | 17    | 9.09  | 9.1            |
| In a relationship / married woman | 170 | 187   | 90.91 | 100.0          |
| <b>Income</b>                     |     |       |       |                |
| to 1000zł                         | 9   | 9     | 4.81  | 4.8            |
| 1000–1500 PLN                     | 15  | 24    | 8.02  | 12.8           |
| 1500–2000 PLN                     | 54  | 78    | 28.88 | 41.7           |
| 2000–2500 PLN                     | 68  | 146   | 36.36 | 78.1           |
| 2500–3000 PLN                     | 31  | 177   | 16.58 | 94.7           |
| 3000–4000 PLN                     | 8   | 185   | 4.28  | 98.9           |
| above 4000 PLN                    | 2   | 187   | 1.07  | 100.0          |
